# Supplementary material for: Circadian Phase Has Profound Effects on Differential Expression Analysis
Source: PubMed Central journal article supplement (PMC3502281; doi:10.1371/journal.pone.0049853), 2012-11-20

# Fig. S2

## A

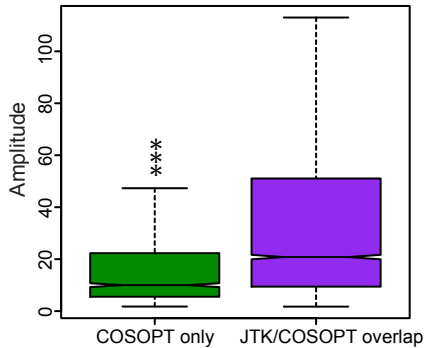

## B

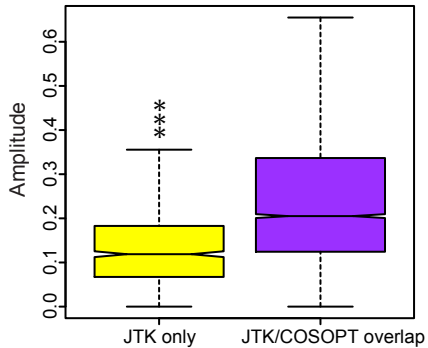

Supplement: pone.0049853.s002.pdf [file pone.0049853.s002.pdf]
