# Supplementary material for: Circadian Phase Has Profound Effects on Differential Expression Analysis
Source: PubMed Central journal article supplement (PMC3502281; doi:10.1371/journal.pone.0049853), 2012-11-20

# Fig. S3

Meta.C+J.intersect  
Agronomics1  
(5836)

Covington.meta  
ATH1 (3964)

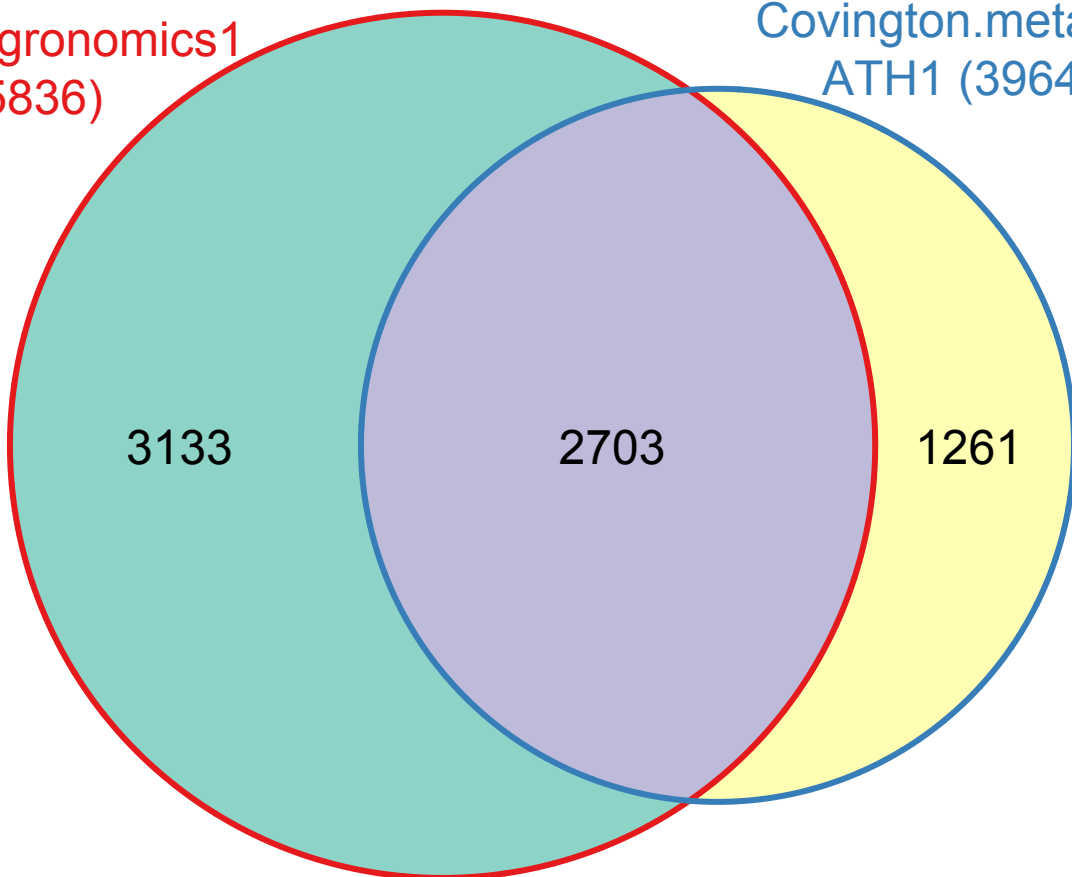

Supplement: pone.0049853.s003.pdf [file pone.0049853.s003.pdf]
