# Supplementary material for: Circadian Phase Has Profound Effects on Differential Expression Analysis
Source: PubMed Central journal article supplement (PMC3502281; doi:10.1371/journal.pone.0049853), 2012-11-20

**Fig. S5**

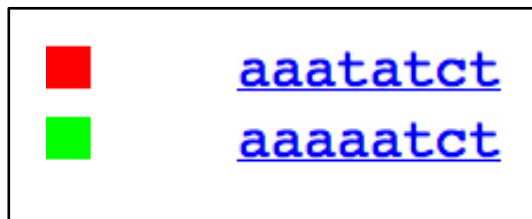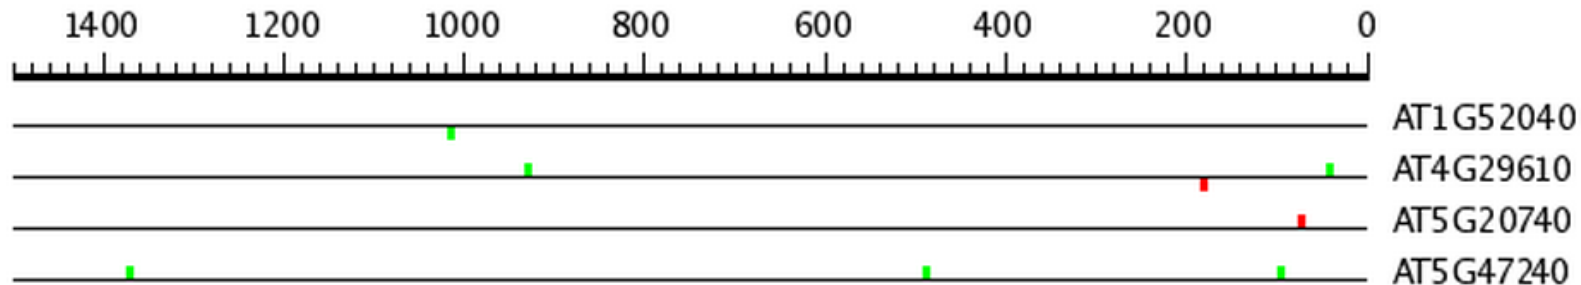

Supplement: pone.0049853.s005.pdf [file pone.0049853.s005.pdf]
